# Supplementary material for: Biodegradation and Metabolic Pathway of Sulfamethoxazole by Sphingobacterium Mizutaii
Source: Research Square preprint supplement (doi:10.21203/rs.3.rs-778059/v1), 2021-08-10

Fig. S1 LC−MS spectrum of intermediates formed during the degradation of SMX by *S. mizutaii* LLE5.

1. LC−MS spectrum of sulfanilamide (171 m/z, ESI negative ion mode ).

1. LC−MS spectrum of 4-aminothiophenol (124 m/z, ESI negative ion mode ).


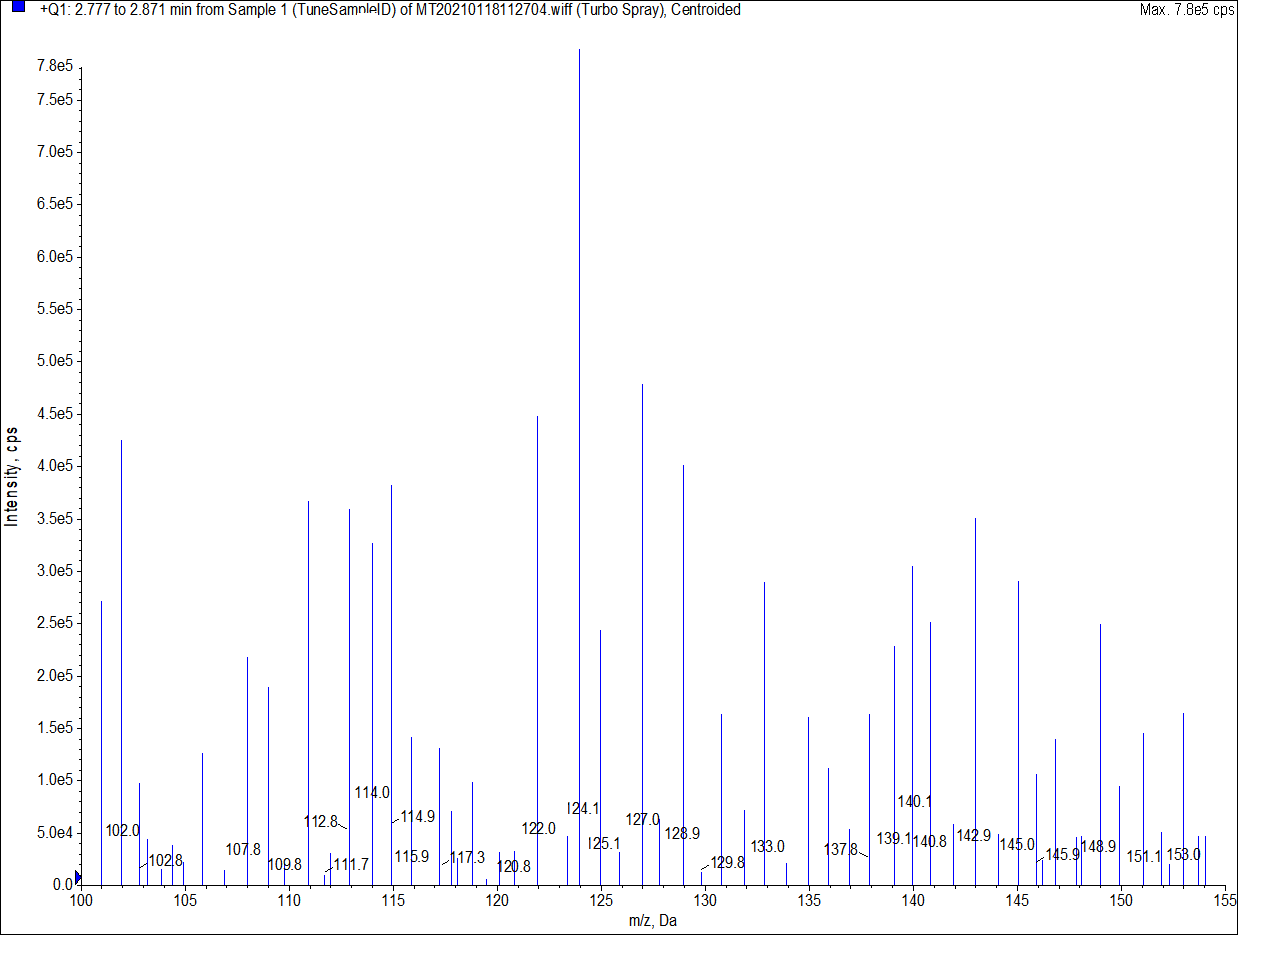


1. LC−MS spectrum of 3-amino-5-methylisoxazole (99 m/z, ESI positive ion mode).

1. LC−MS spectrum of aniline (92 m/z, ESI negative ion mode )


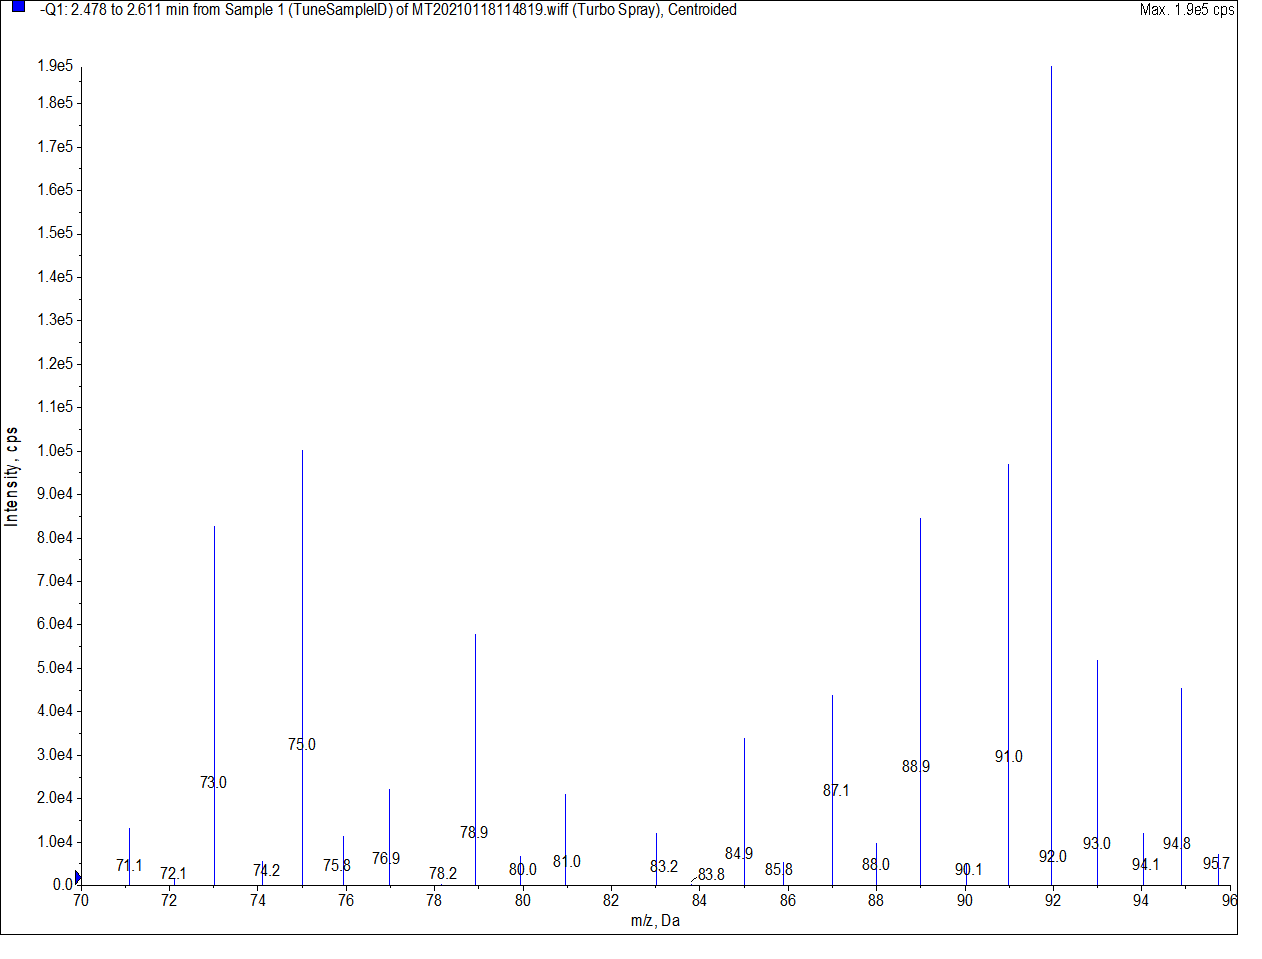

Supplement: Supplementary file 1 [file 8c6e5a80aef83dce2729b34b.docx]
